# Supplementary material for: Developing informative microsatellite makers for non-model species using reference mapping against a model species’ genome
Source: PubMed Central journal article supplement (PMC4791680; doi:10.1038/srep23087), 2016-03-15
Supplement: srep23087-s2.pdf [file srep23087-s2.pdf]

**Title: Developing informative microsatellite makers for non-model species using reference mapping against a model species' genome**

Chih-Ming Hung<sup>1</sup>, Ai-Yun Yu<sup>2</sup>, Yu-Ting Lai<sup>2</sup> and Pei-Jen L. Shaner<sup>2\*</sup>

Supplementary materials:

Supplementary Figure S1

Supplementary Table S2

**Supplementary Figure S1.** Map Viewer results of *Mus musculus* (the upper part) and BLASTX results, which comparing *Apodemus semotus* DNA sequences against *M. musculus* protein sequences (the lower part). In the Map Viewer results, digits along the X-axis indicate the locations in the corresponding *M. musculus* chromosomes, horizontal green lines indicate introns and short, vertical green lines indicate exons. Gene names are shown next to the green lines. Purple lines indicate predicted or uncharacterized genes (labeled as “Gm”, “LOC” or “Rik”) or microRNA (labeled as “Mir”). Long, vertical red lines indicate the locations of the microsatellite loci, and the names of the loci are shown above the red lines. Rectangles indicate 10 kbp segments along *A. semotus* chromosomes anchored on the microsatellite loci. Empty rectangles indicate no BLASTX coding regions found in that 10 kbp segments, whereas blue or black ones (used alternatively for distinguishing different blasted genes) indicate positive BLASTX coding regions located in that 10 kbp segments with gene names shown next to them.

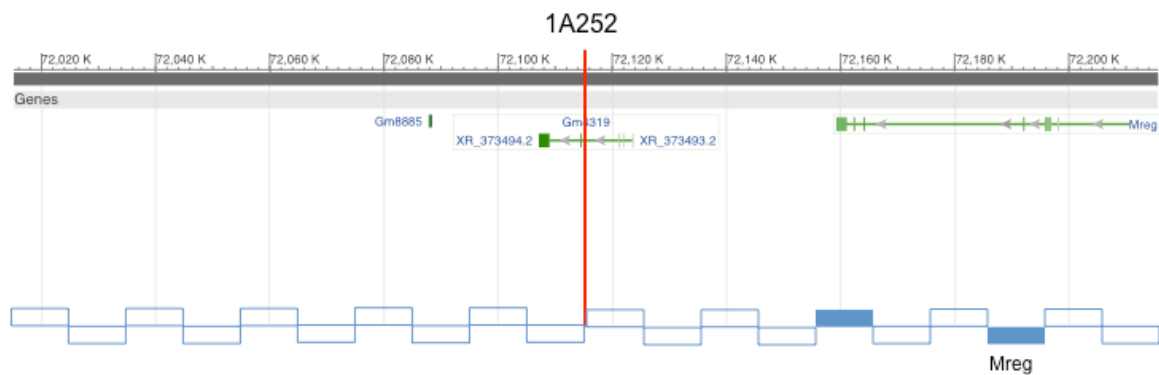

### 1A720

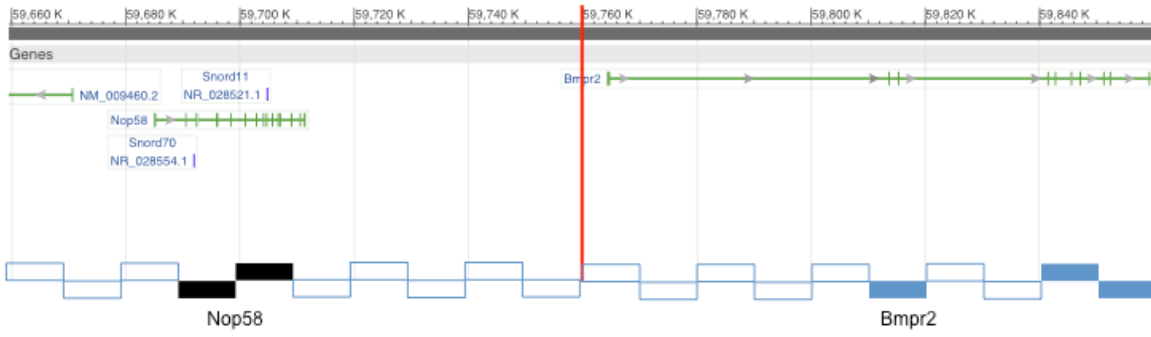

### 1A1076

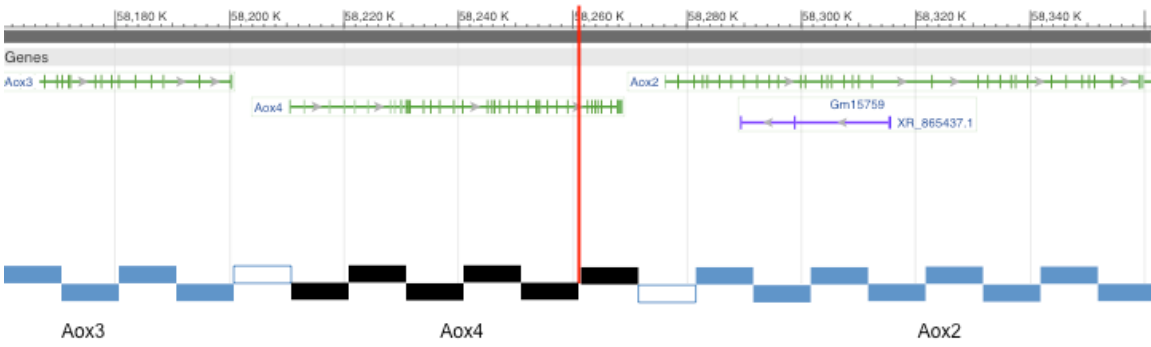

### 2A1340

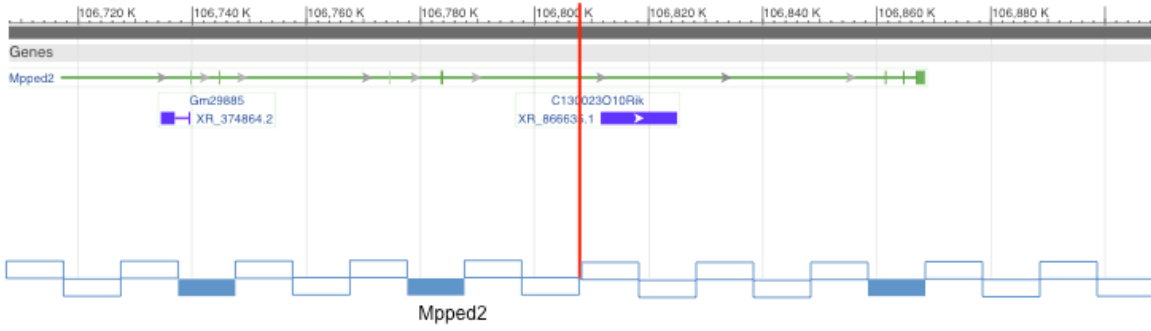

### 2A1612

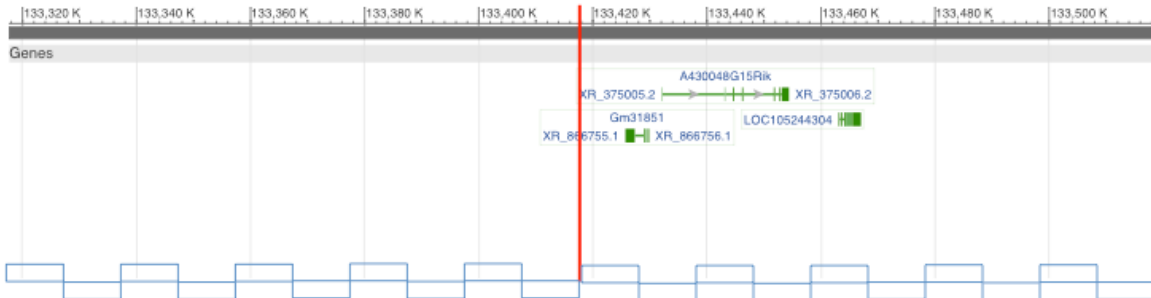

### 2A2910

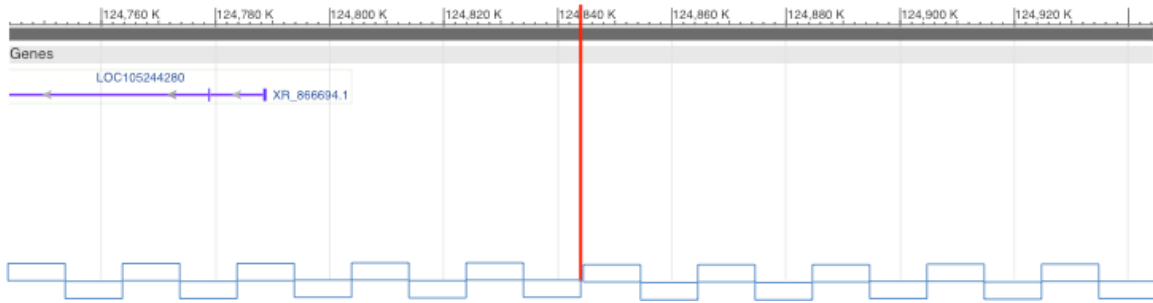

### 2B430

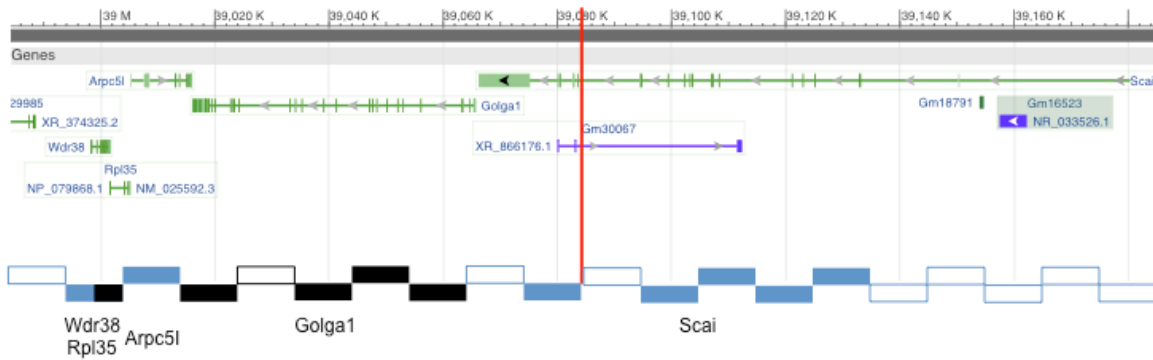

### 2B756

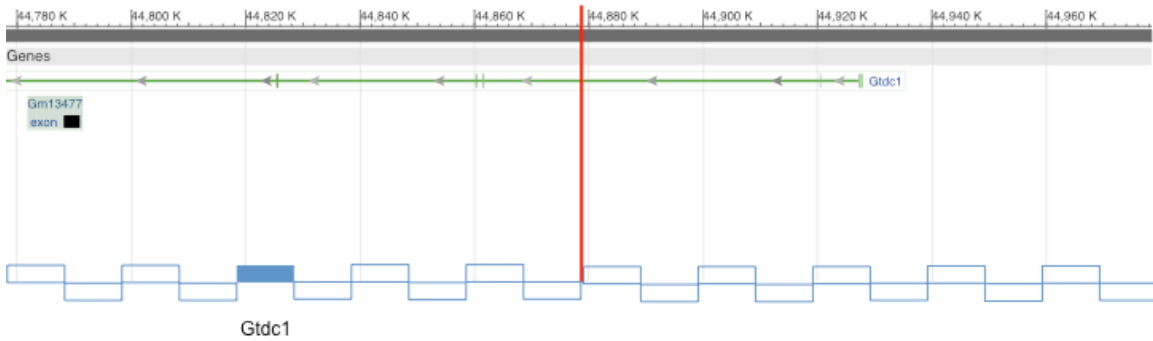

### 3A1720

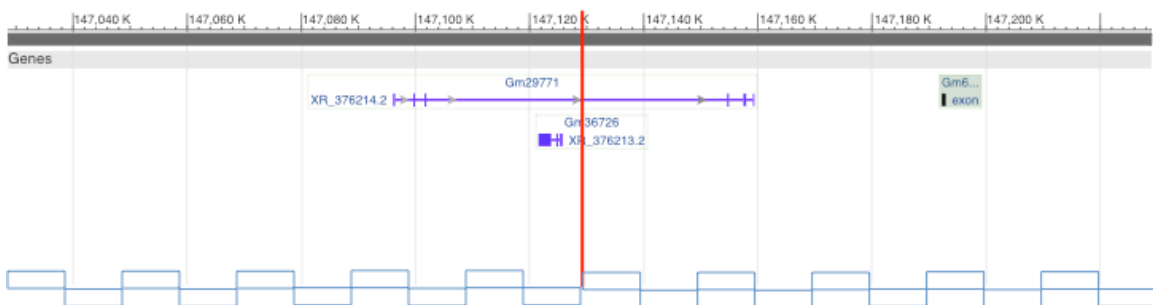

### 3A2393

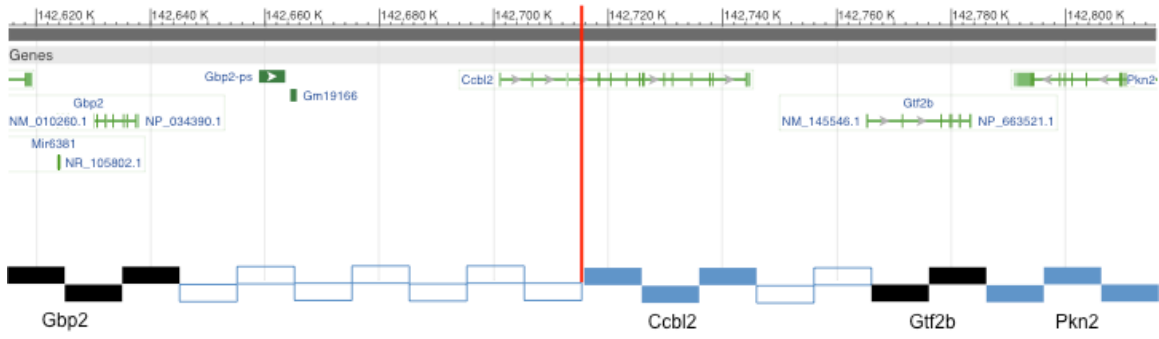

### 4A2042

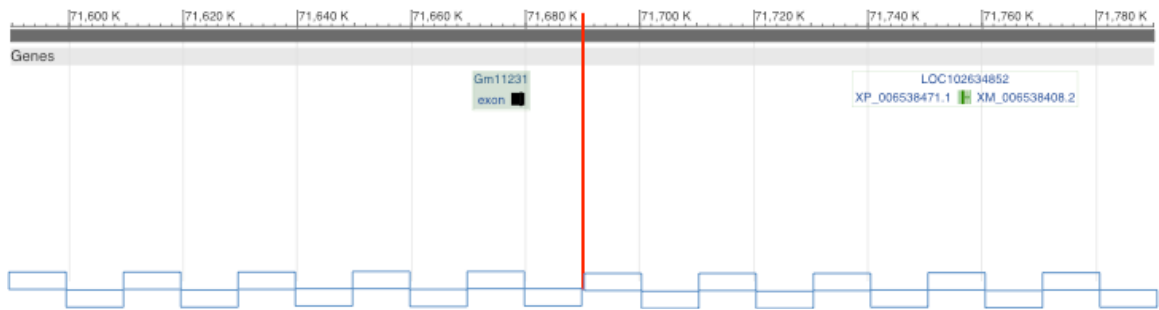

### 4A2131

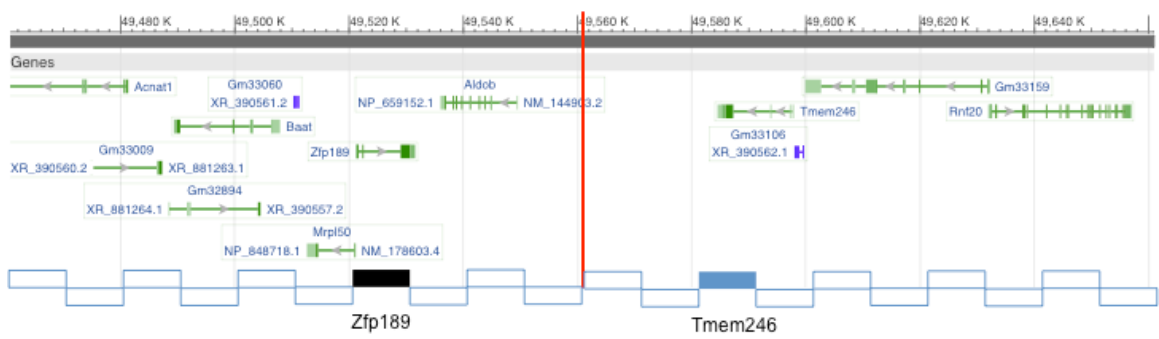

### 4A2138

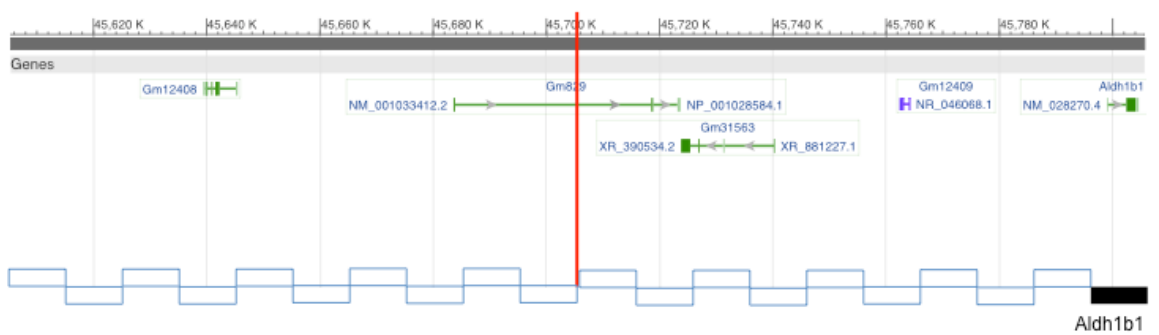

### 4B263

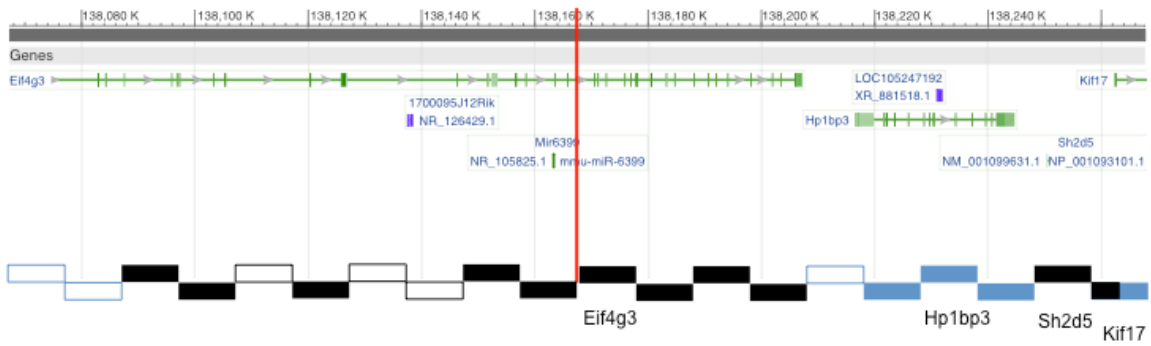

### 5A296

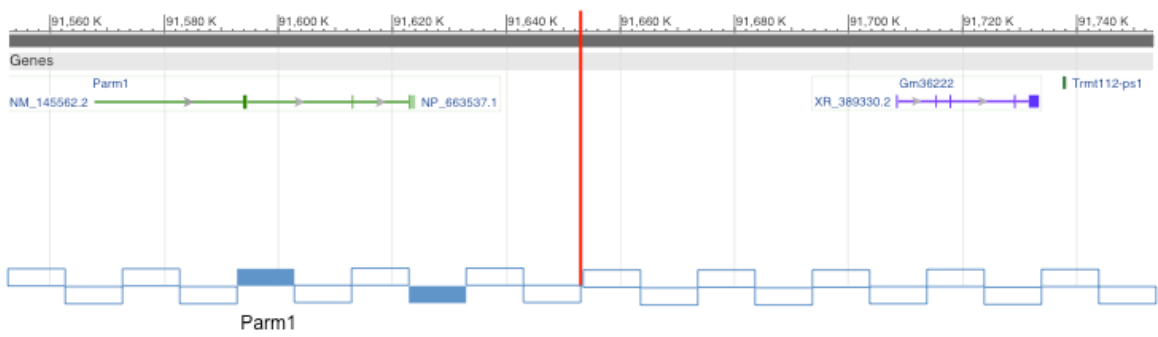

### 5A672

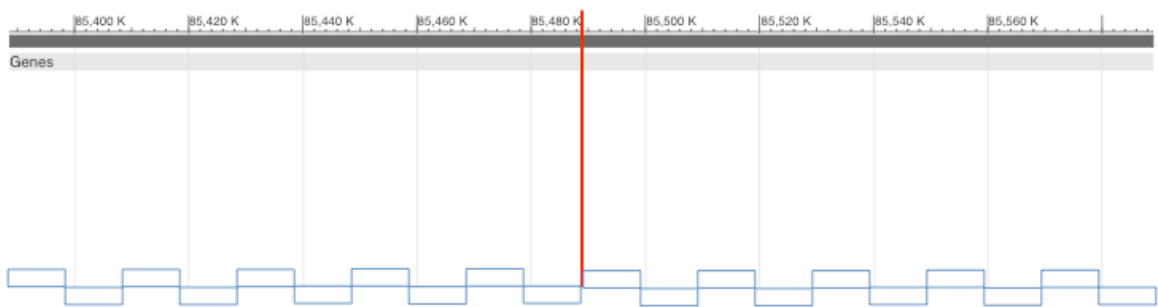

### 5B59

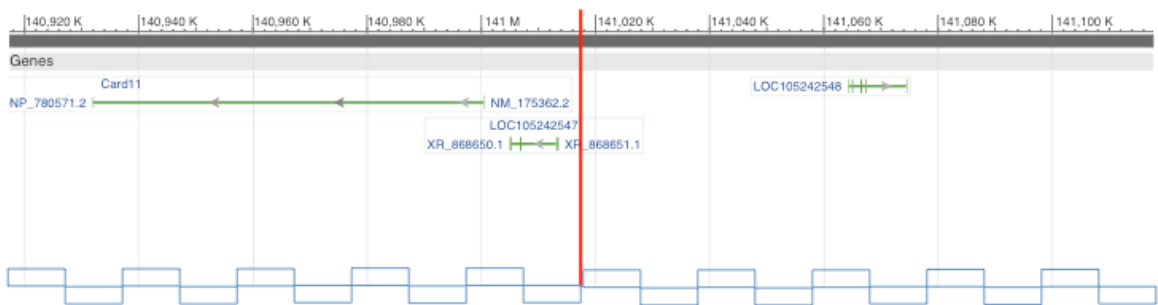

6A496

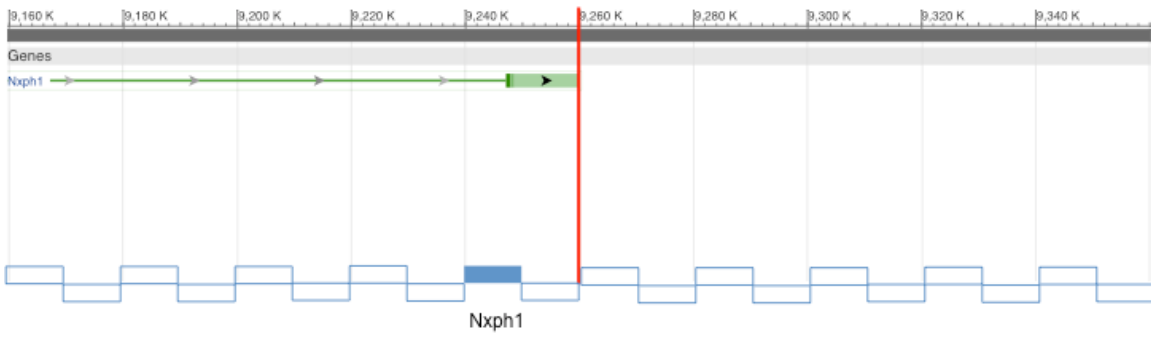

6A565

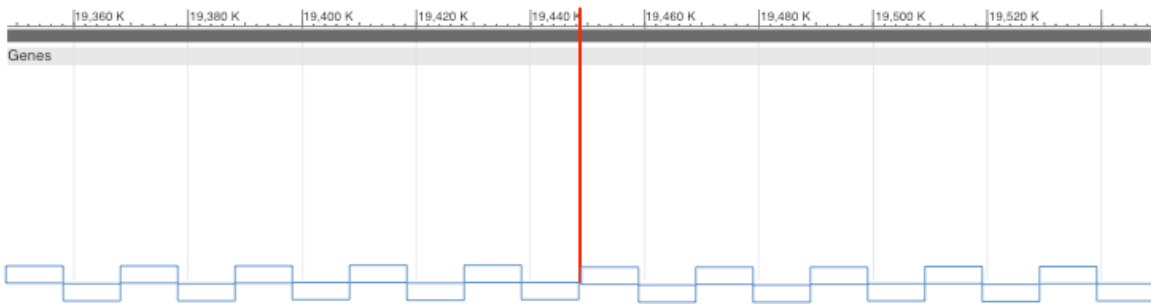

8A401

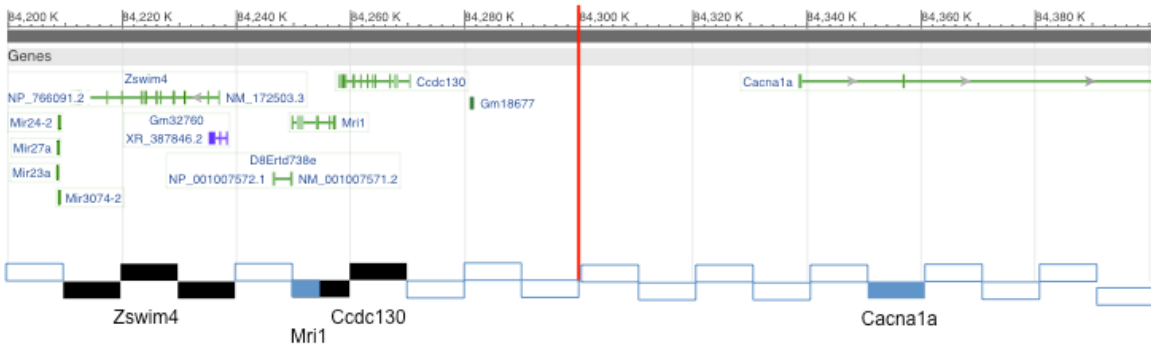

8A472

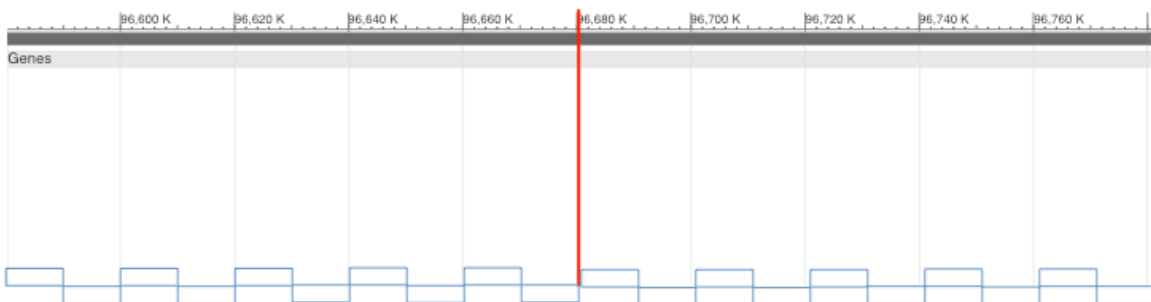

### 8A1226

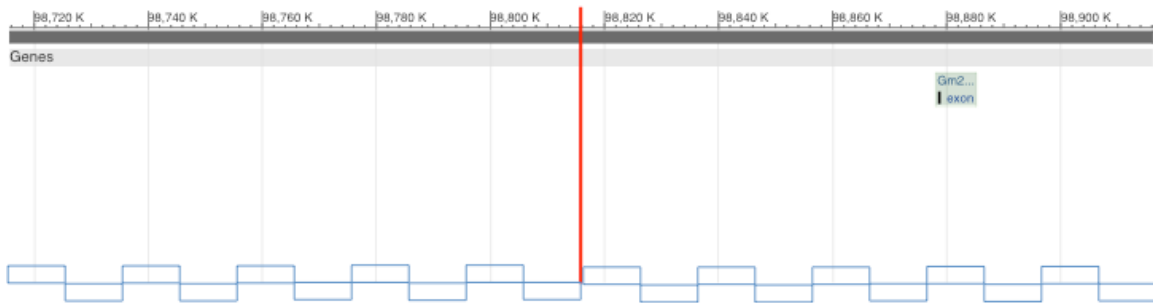

### 9A300

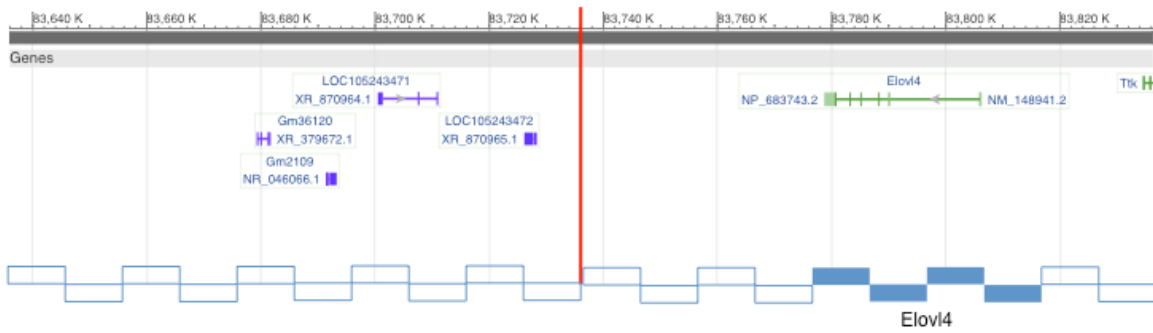

### 9A338

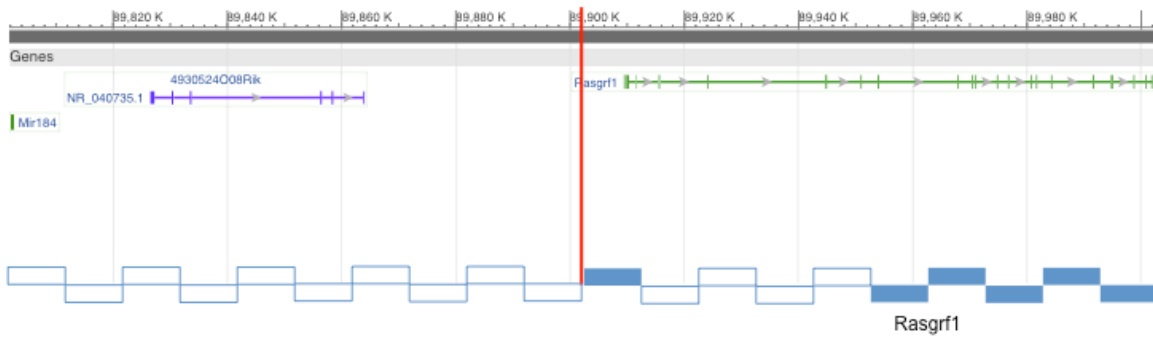

### 9A1141

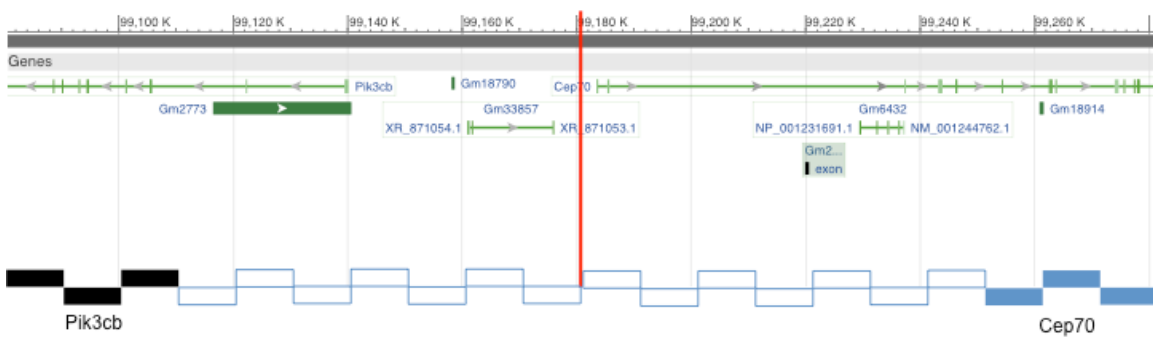

### 9B815

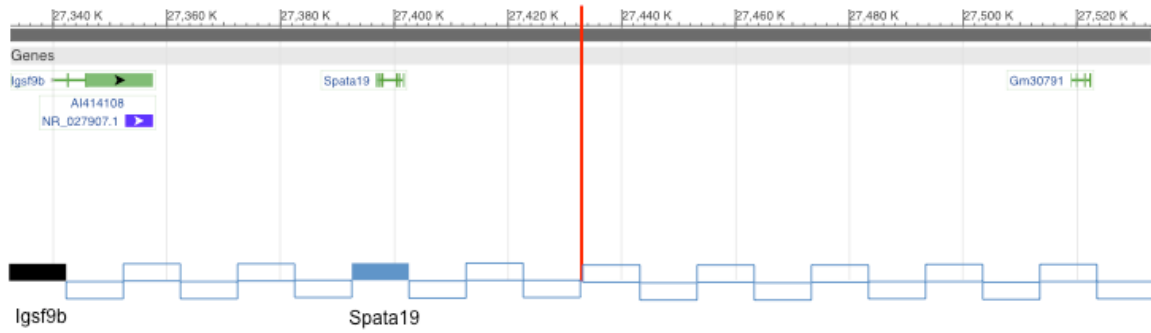

### 9B878

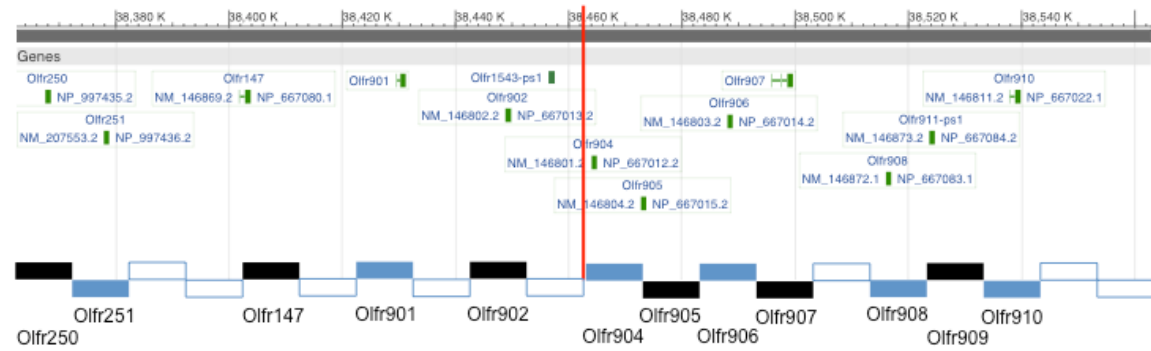

### 10A44

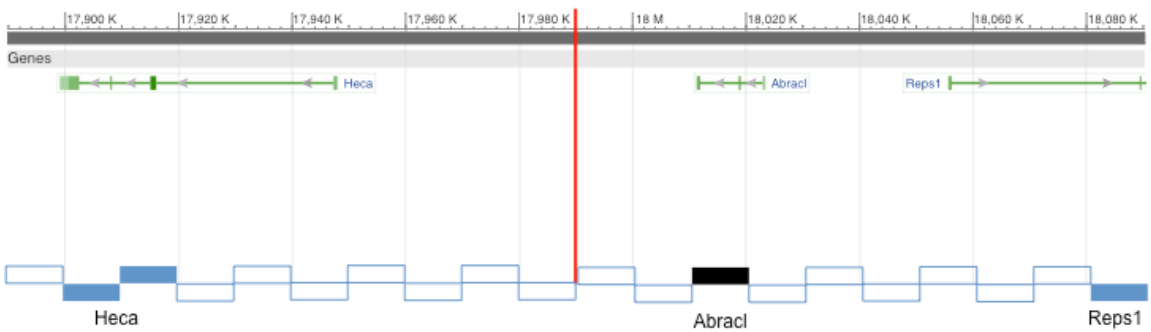

### 10A378

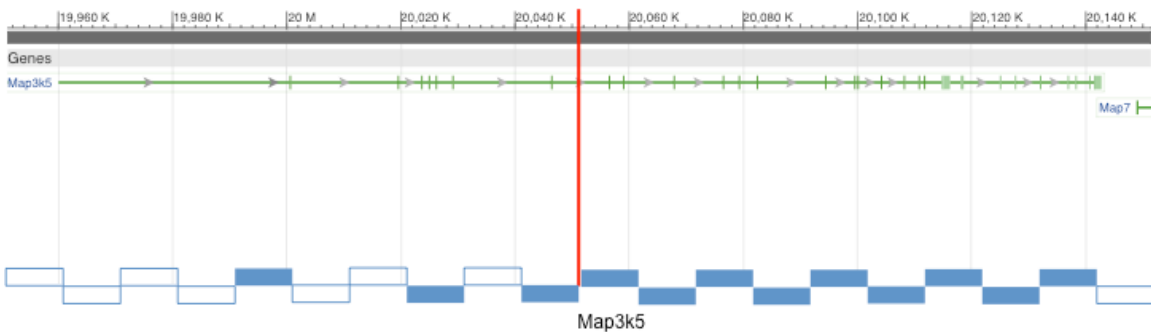



### 10A496

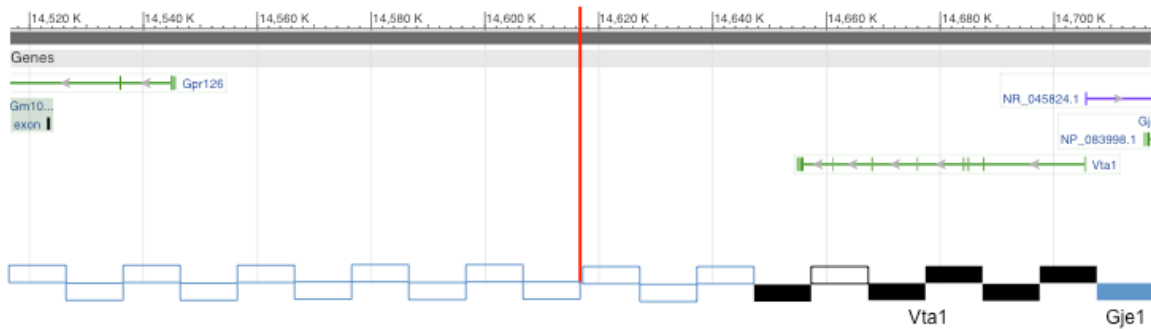

### 10B1320

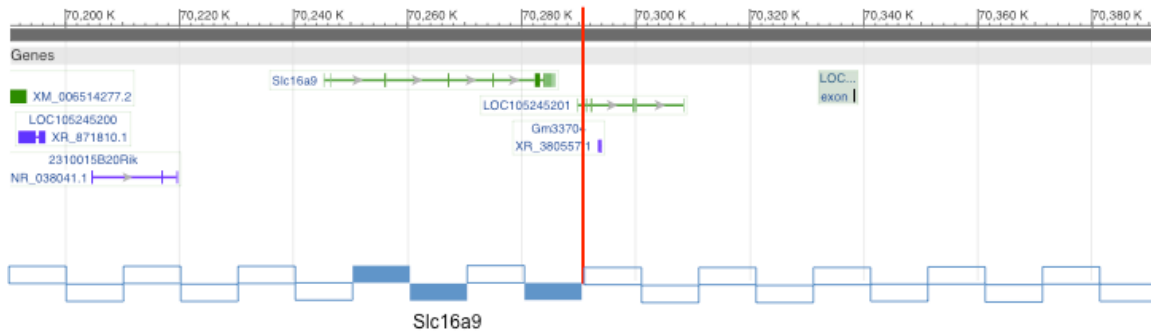

### 10B1562

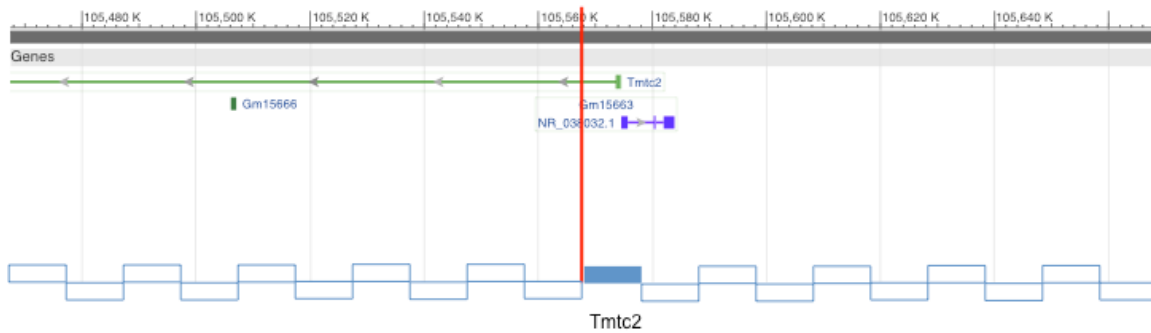

### 11A172

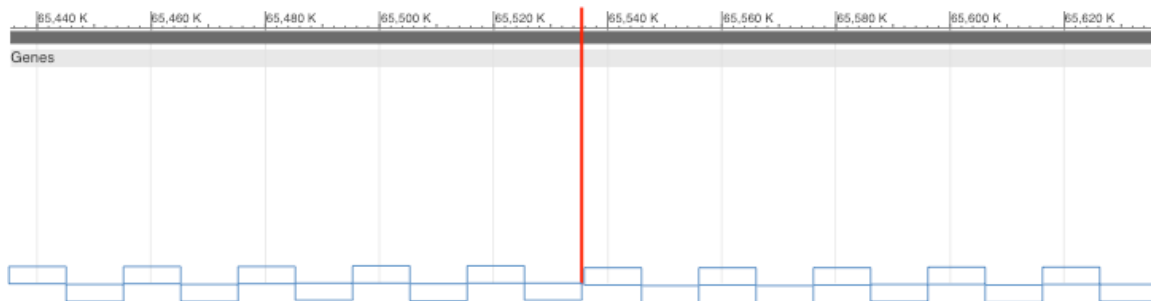

### 11A2041

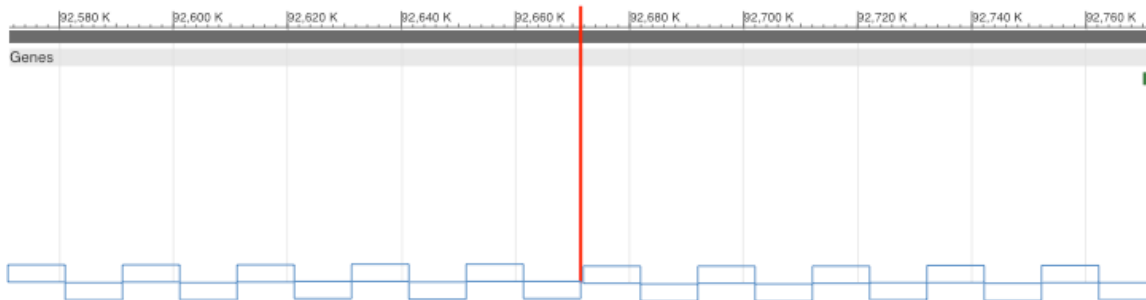

### 12A204

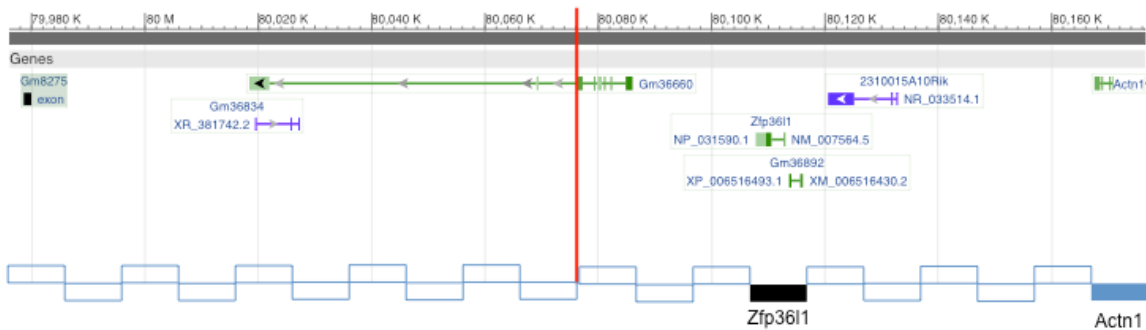

### 12A1292

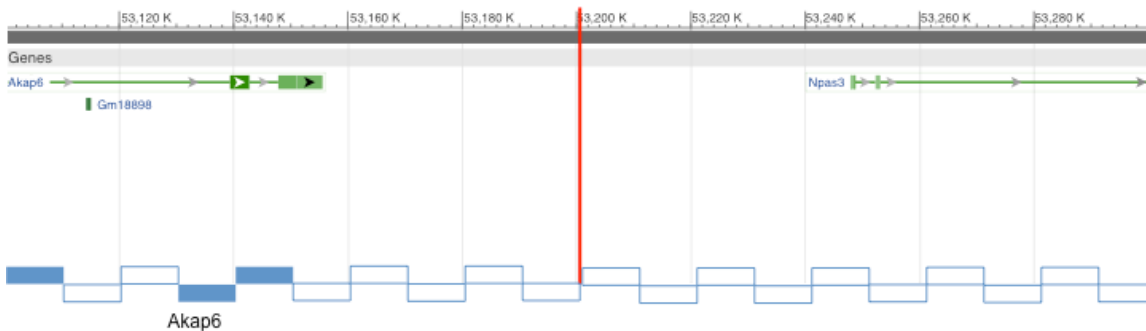

### 12A1851

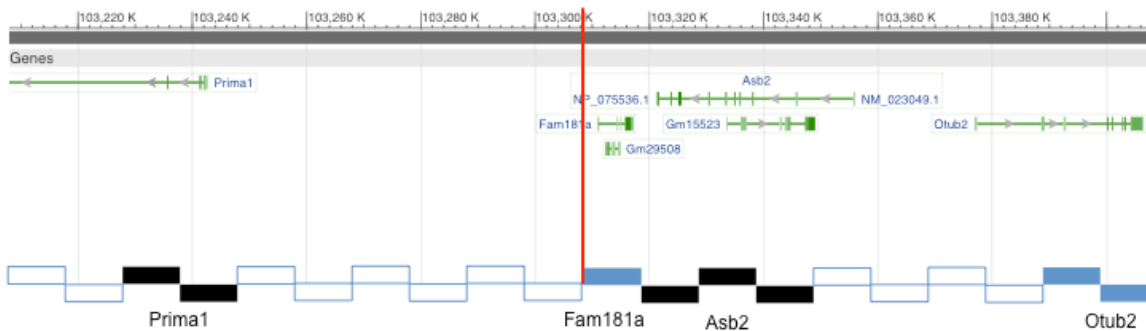

### 12B30

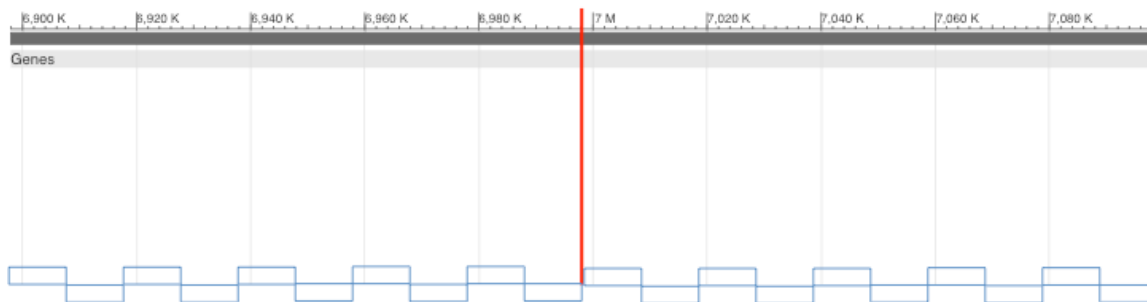

### 12B908

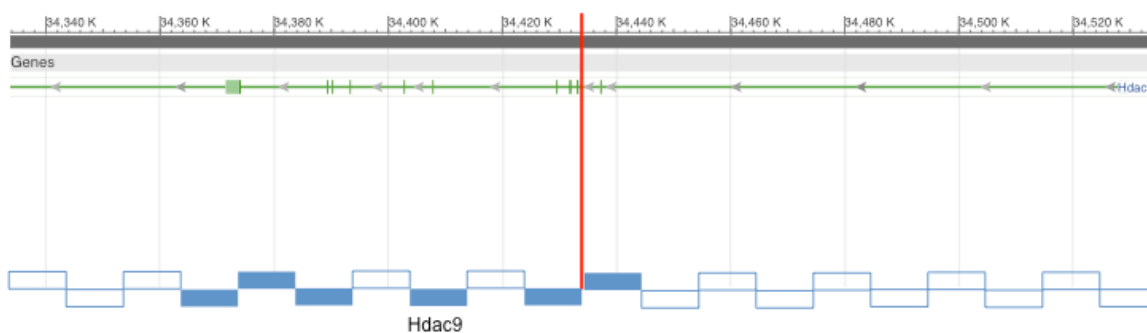

### 13A191

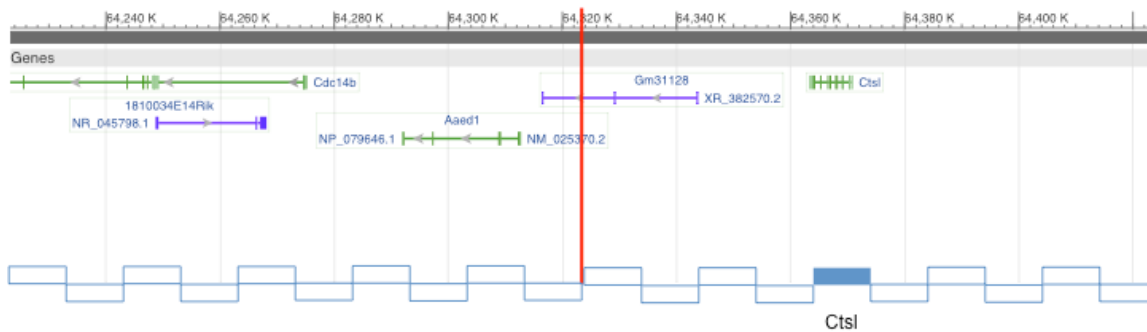

### 13B150

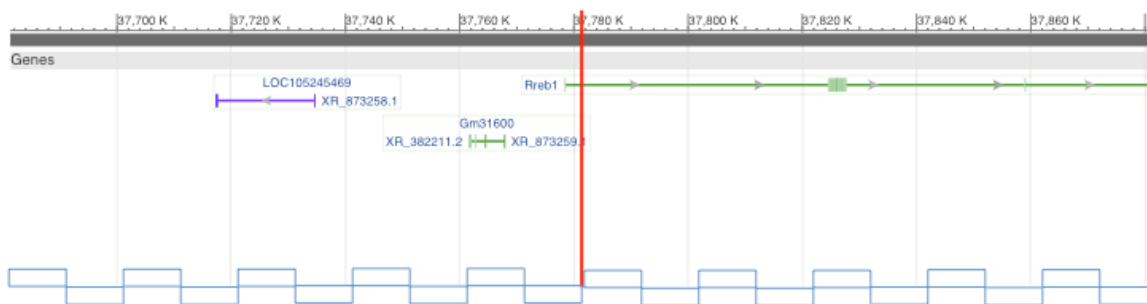

### 14A594

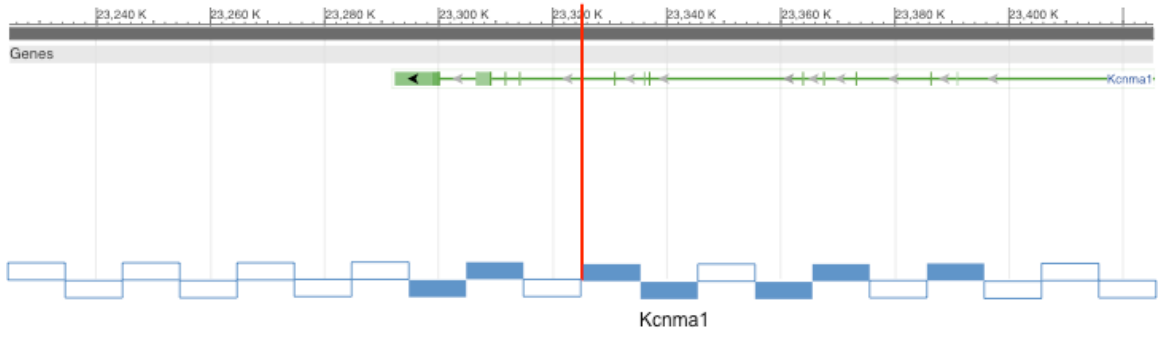

### 14A681

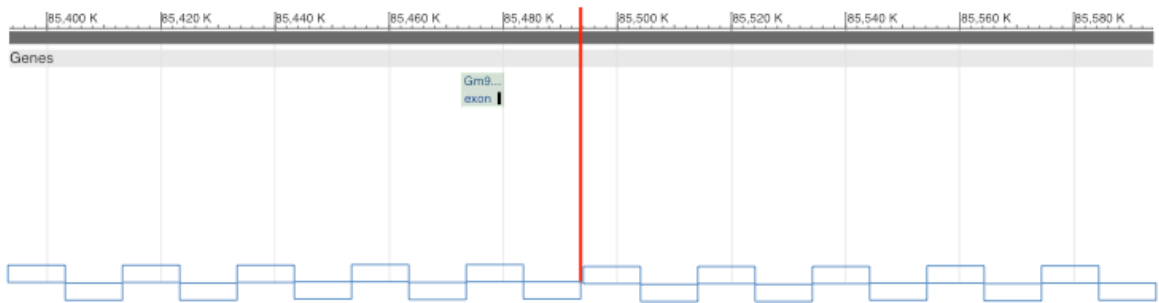

### 15A446

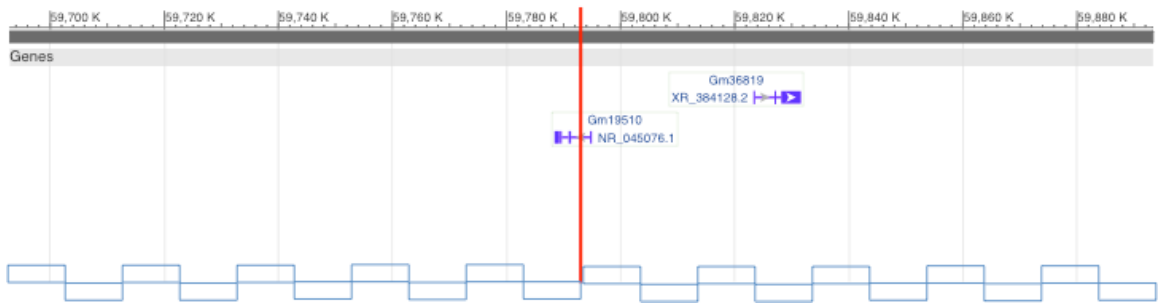

### 15A493

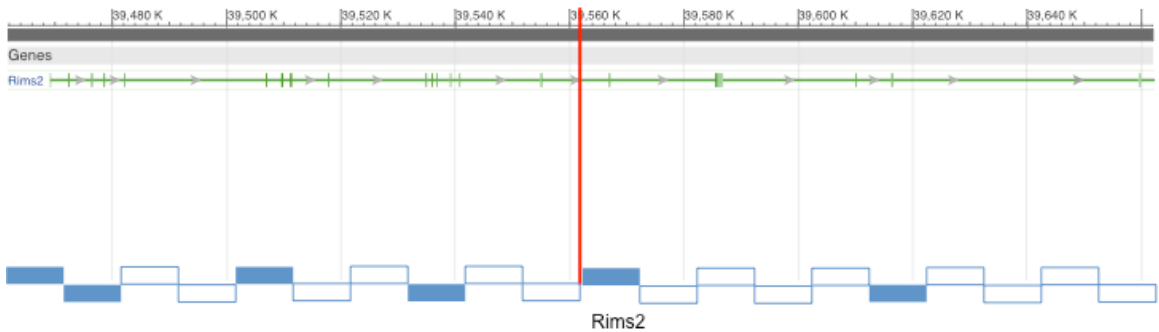

### 15A1106

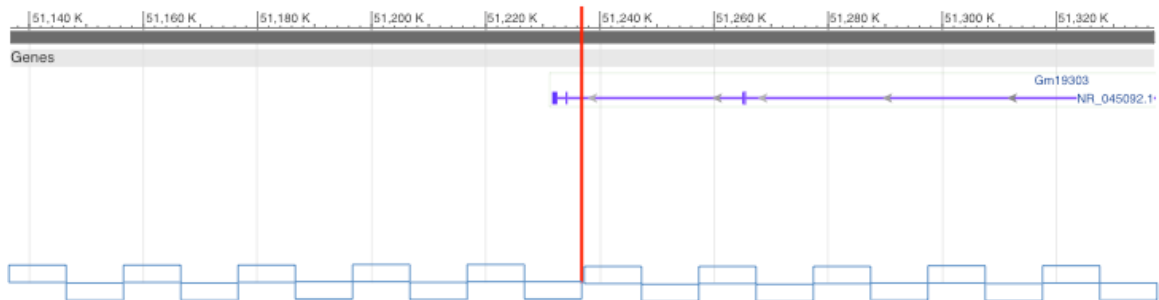

### 15B141

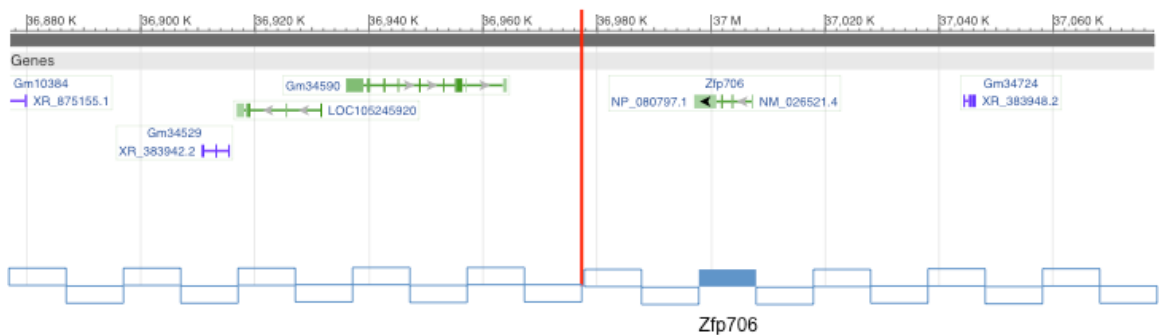

### 15B636

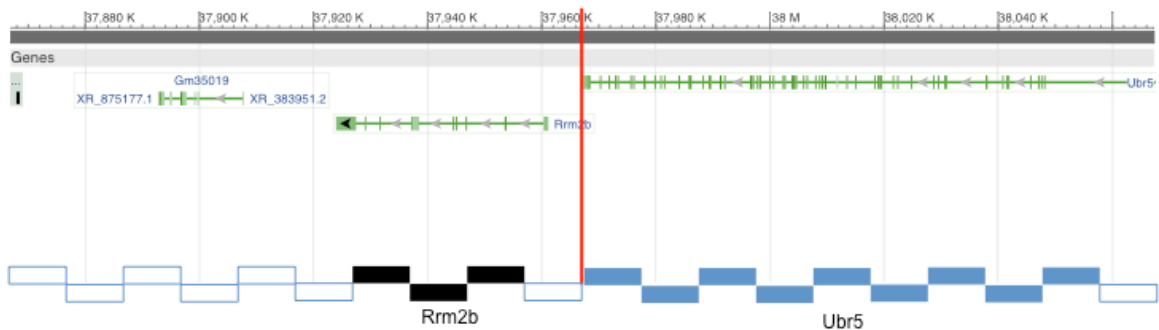

### 16A373

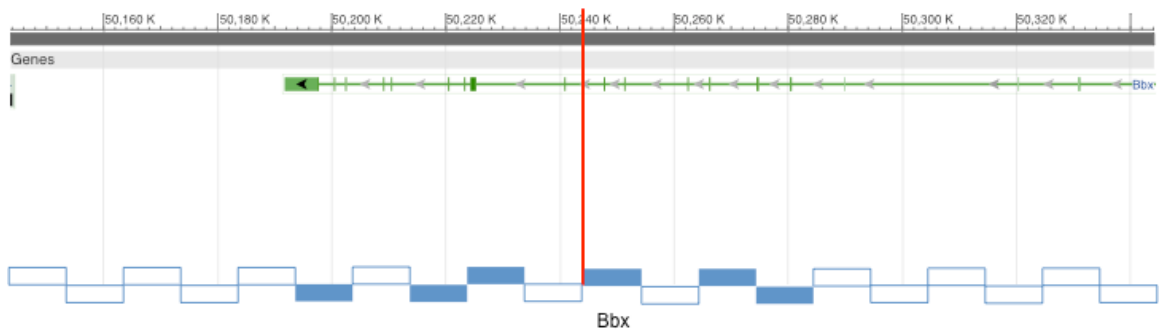

16B785

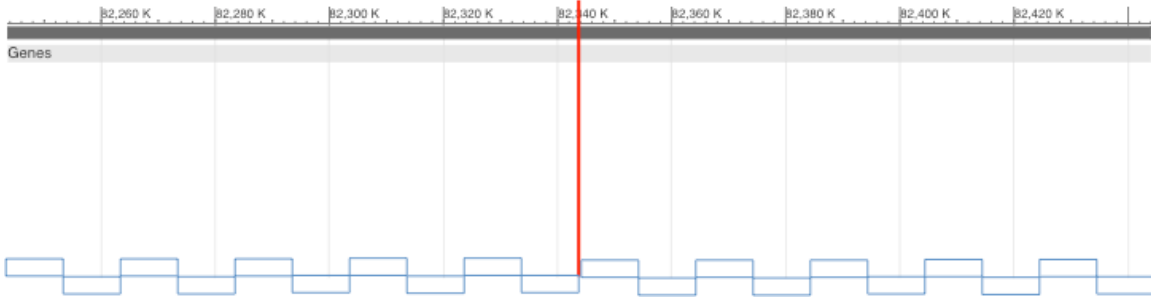

17A352

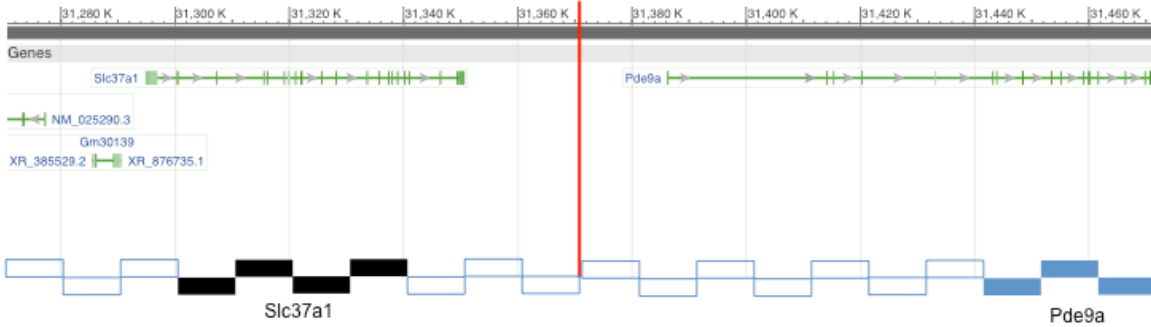

17A410

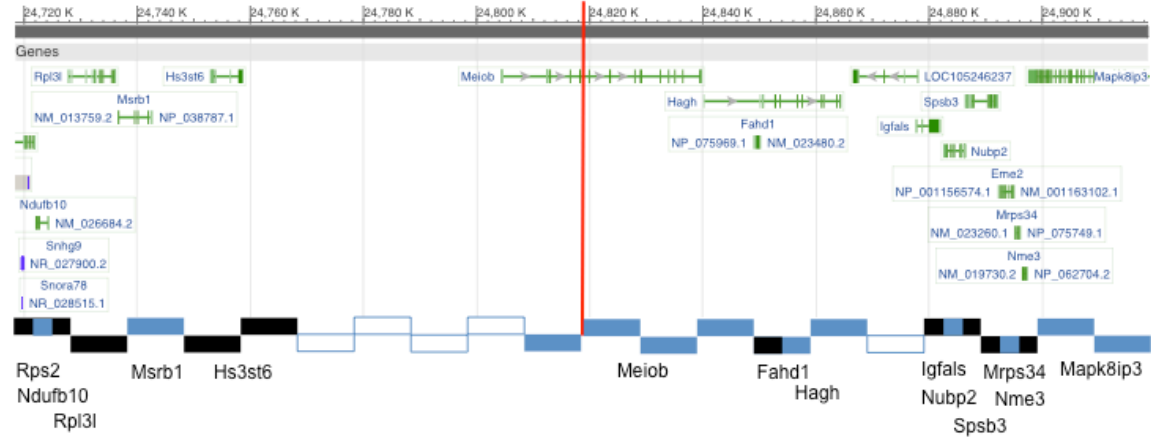

17A501

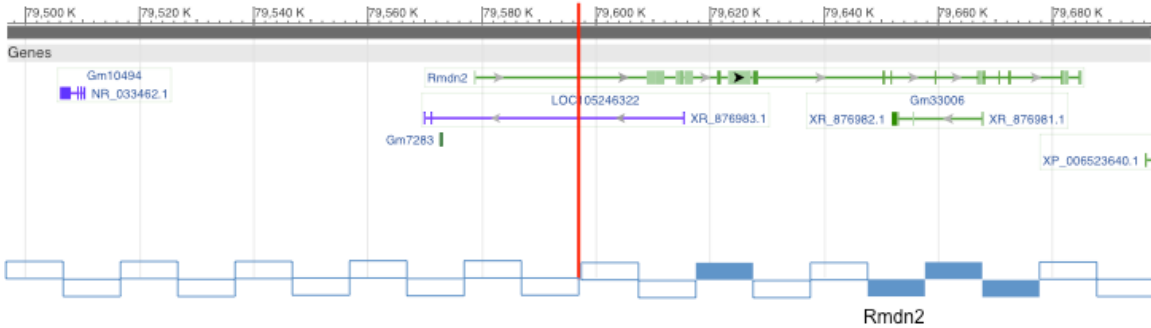

18A352

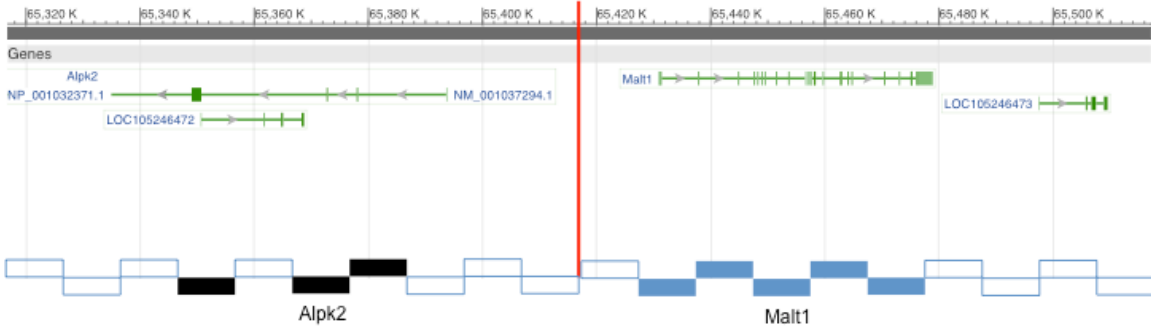

18A506

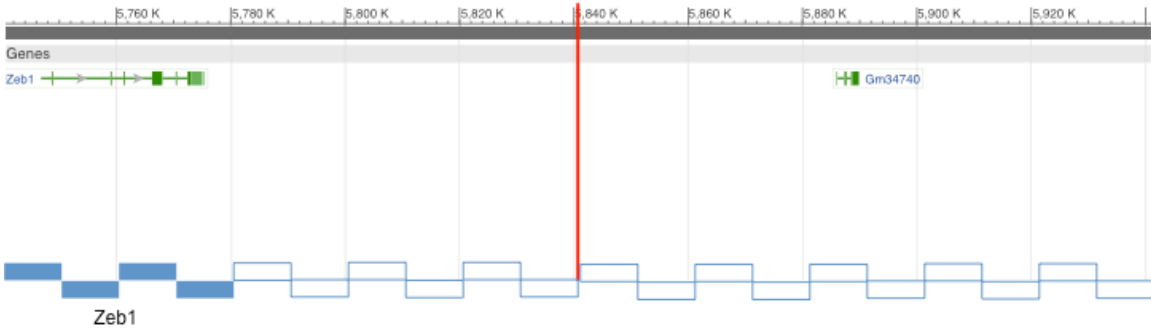

18A1452

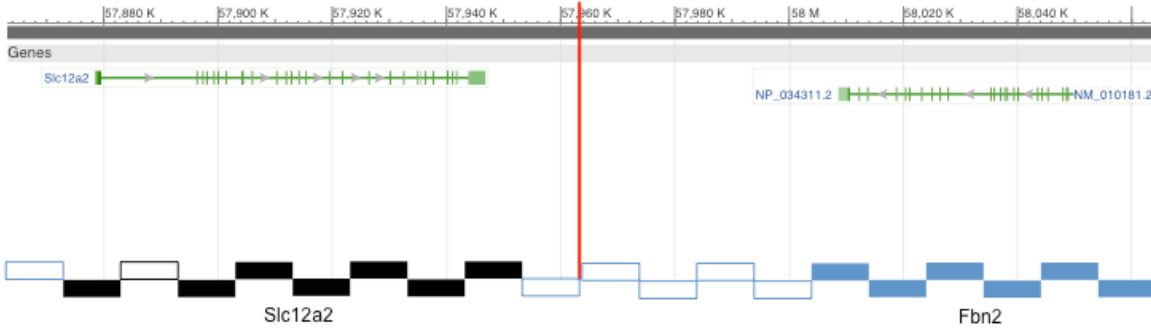

19A40

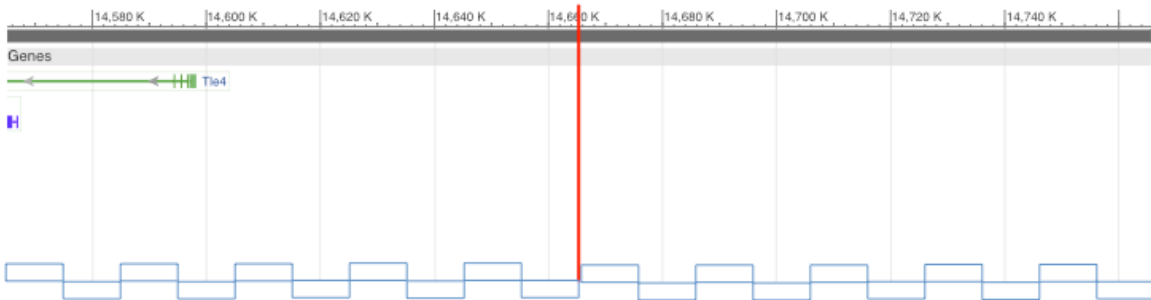

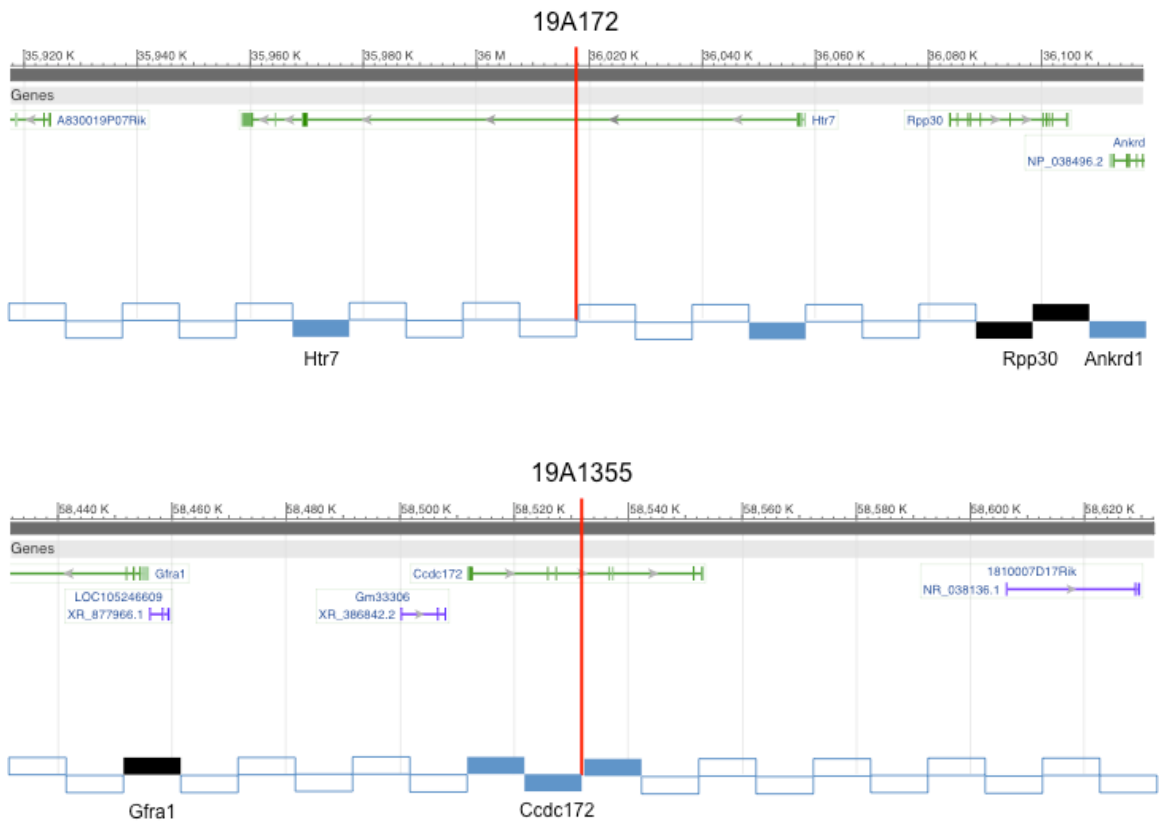

**Supplementary Table 2.** Laboratory cost, time and yield compared between the traditional approaches of microsatellite isolation based on cloning and Sanger sequence<sup>36,37</sup> and our approach based reference genome mapping.

|                     | Traditional approaches<br>(Cloning + Sanger sequencing) | Our approach<br>(Shotgun sequencing +<br>reference genome mapping) |
|---------------------|---------------------------------------------------------|--------------------------------------------------------------------|
| Time for bench work | 1 - 4 weeks                                             | 1 - 2 days                                                         |
| Cost (USD)          | 1,100 – 4,400                                           | 3,000                                                              |
| Yield (loci)        | 100                                                     | 1,456                                                              |
| Cost / locus        | 11 - 44                                                 | 2.1                                                                |
